# Supplementary figures and images for: New Approach Methods to Assess the Enteropathogenic Potential of Strains of the Bacillus cereus Group, including Bacillus thuringiensis
Source: MDPI journal article supplement (doi:10.3390/foods13081140), 2024-04-09

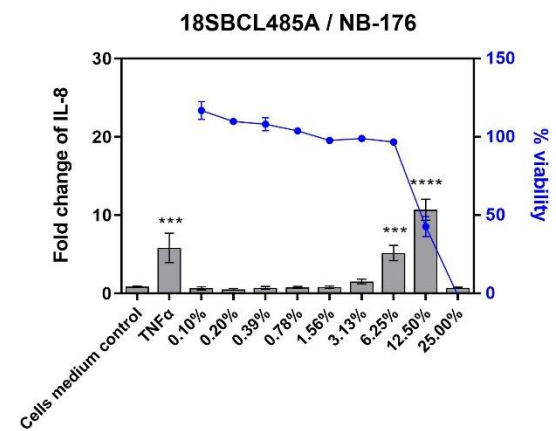

Supplement: s1 [file s1]
